# Supplementary material for: Improved imputation quality of low-frequency and rare variants in European samples using the ‘Genome of The Netherlands'
Source: PubMed Central journal article supplement — Eur J Hum Genet. 2014 Jun 4;22(11):1321–6. doi: 10.1038/ejhg.2014.19 (PMC4200431; doi:10.1038/ejhg.2014.19), 2014-06-04

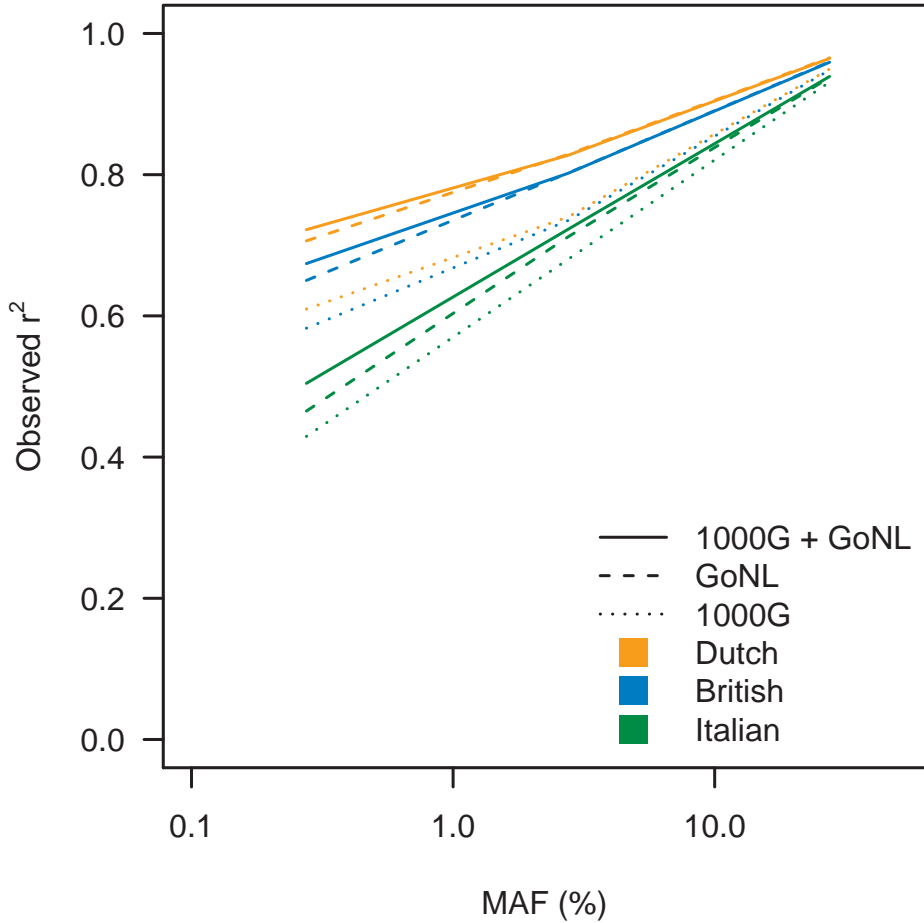

Supplement: ejhg201419x1.pdf [file ejhg201419x1.pdf]
